# Supplementary material for: A cationic naphthyl derivative defies the non-equilibrated excited rotamers principle
Source: Royal Society of Chemistry journal article supplement (doi:10.1039/c6cp08311k), 2017-01-01
Supplement: c6cp08311k1.pdf [file c6cp08311k1.pdf]

## Electronic Supplementary Information

### A cationic naphthyl derivative defies the Non Equilibrated Excited Rotamers principle

A. Cesaretti, B. Carlotti, F. Elisei, C.G. Fortuna, G. Consiglio and A. Spalletti

#### Spectral behaviour

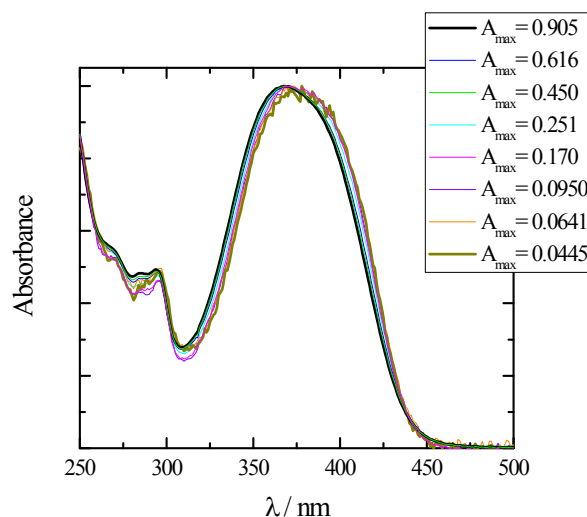

**Figure 1S.** Concentration effect on the absorption spectrum of 2-N in DCM.

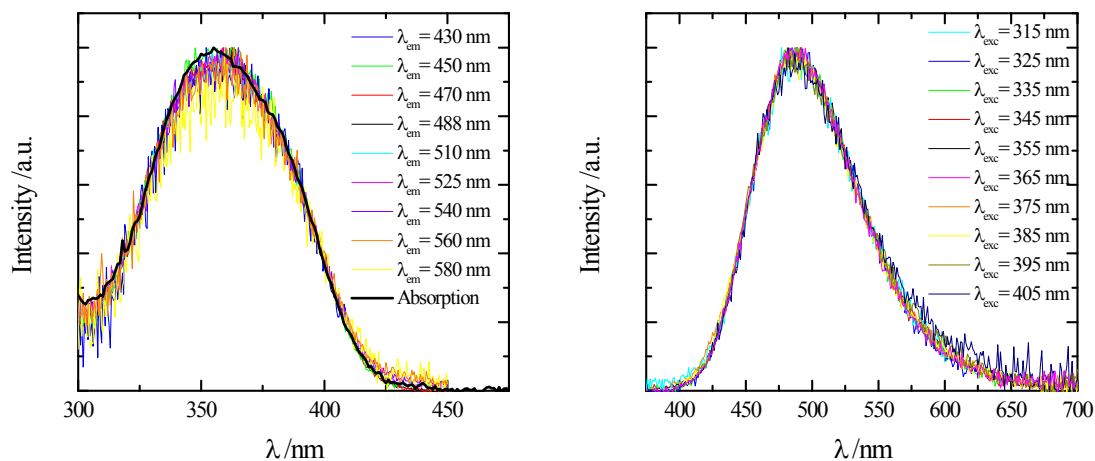

**Figure 2S.** Emission wavelength effect on the excitation spectrum (left graph, with  $\lambda_{em}$  = 430–580 nm, the absorption is reported for comparison in thick black line) and excitation wavelength effect on the emission spectrum (right graph, with  $\lambda_{exc}$  = 315–405 nm) for 2-N in MeOH at room temperature.

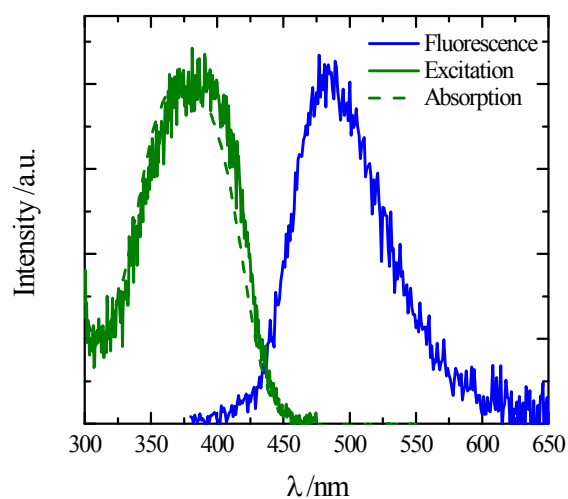

**Figure 3S.** Absorption (olive dashed line), excitation (olive solid line) and emission (blue solid line) spectra of **2-N** in dilute DCM at room temperature.

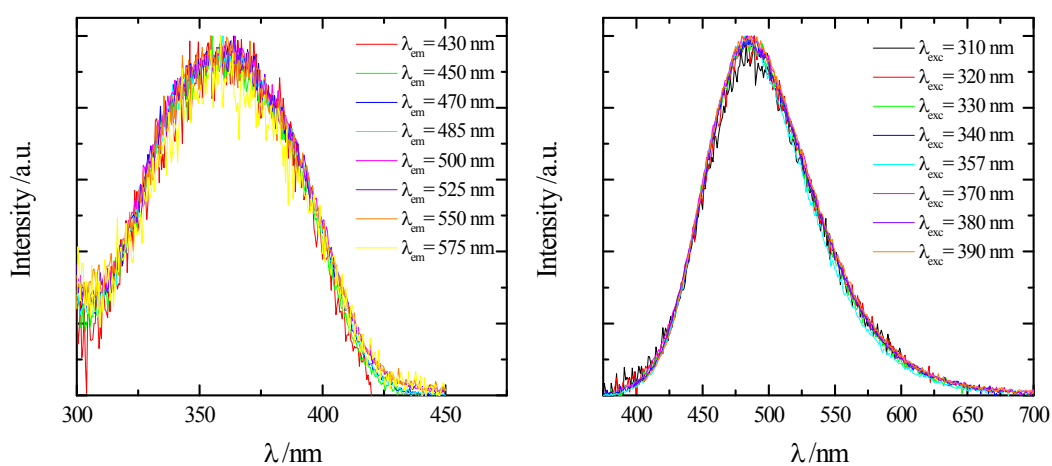

**Figure 4S.** Emission wavelength effect on the excitation spectrum (left graph, with  $\lambda_{em}$  = 430–575 nm) and excitation wavelength effect on the emission spectrum (right graph, with  $\lambda_{exc}$  = 310–390 nm) for **2-N** in EtGly at room temperature.

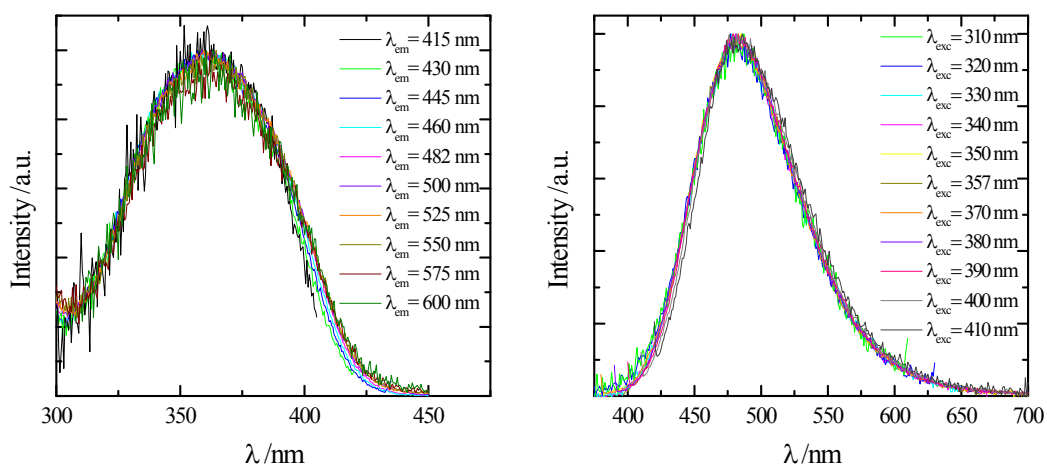

**Figure 5S.** Emission wavelength effect on the excitation spectrum (left graph, with  $\lambda_{em}$  = 415–600 nm) and excitation wavelength effect on the emission spectrum (right graph, with  $\lambda_{exc}$  = 310–410 nm) for **2-N** in MeOH/Gly 50/50 at room temperature.

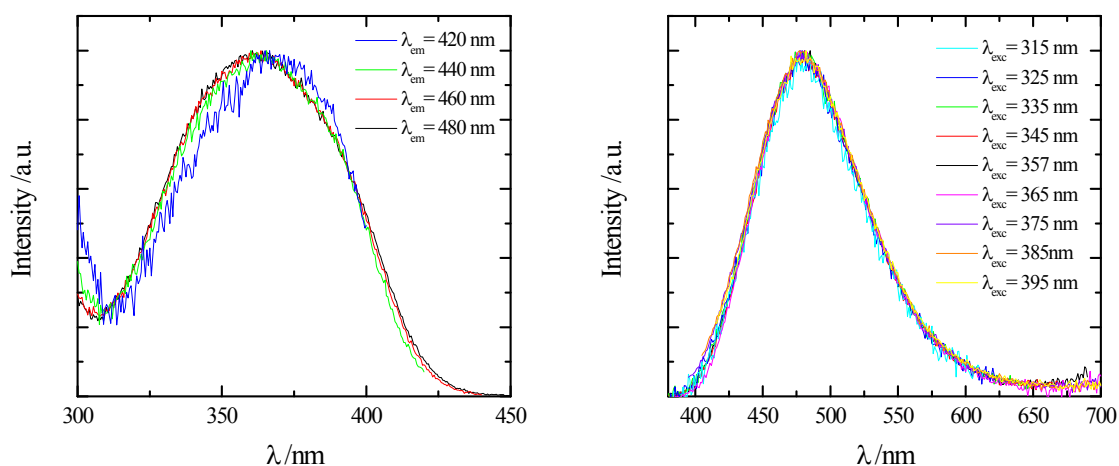

**Figure 6S.** Emission wavelength effect on the excitation spectrum (left graph, with  $\lambda_{em}$  = 420–480 nm) and excitation wavelength effect on the emission spectrum (right graph, with  $\lambda_{exc}$  = 315–395 nm) for **2-N** in MeOH/Gly 20/80 at room temperature.

## Quantum-mechanical calculations

**Table 1S.** Theoretical absorption and emission wavelengths of 2-N (rotamers A, B, C and D), oscillator strengths, nature and composition in terms of molecular orbitals obtained by the CAM-B3LYP/6-31+G(d) model in DCM (CPCM), together with the experimental absorption maxima.

| <b>A rotamer</b>                |                   |          |                                     |            |                    |
|---------------------------------|-------------------|----------|-------------------------------------|------------|--------------------|
| <b>Transition</b>               | $\lambda_{th}/nm$ | <b>f</b> | <b>MO</b>                           | $c_i^2/\%$ | $\lambda_{exp}/nm$ |
| S <sub>0</sub> →S <sub>1</sub>  | 374               | 1.3315   | $\pi_H \rightarrow \pi_L^*$         | 80         | 370                |
| S <sub>0</sub> →S <sub>2</sub>  | 315               | 0.1475   | $\pi_{H-1} \rightarrow \pi_L^*$     | 67         |                    |
| S <sub>0</sub> →S <sub>3</sub>  | 275               | 0.1699   | $\pi_H \rightarrow \pi_{L+2}^*$     | 50         |                    |
| S <sub>0</sub> →S <sub>4</sub>  | 262               | 0.2986   | $\pi_H \rightarrow \pi_{L+1}^*$     | 36         |                    |
| S <sub>0</sub> →S <sub>5</sub>  | 246               | 0.1486   | $\pi_{H-1} \rightarrow \pi_{L+2}^*$ | 39         |                    |
| S <sub>0</sub> →S <sub>6</sub>  | 238               | 0.0567   | $\pi_{H-2} \rightarrow \pi_L^*$     | 55         |                    |
| S <sub>0</sub> →S <sub>7</sub>  | 226               | 0.7590   | $\pi_H \rightarrow \pi_{L+3}^*$     | 42         |                    |
| S <sub>0</sub> →S <sub>8</sub>  | 218               | 0.0219   | $\pi_{H-1} \rightarrow \pi_{L+1}^*$ | 27         |                    |
| S <sub>0</sub> →S <sub>9</sub>  | 214               | 0.0265   | $\pi_{H-3} \rightarrow \pi_L^*$     | 49         |                    |
| S <sub>0</sub> →S <sub>10</sub> | 276               | 0.1043   | $\pi_{H-4} \rightarrow \pi_L^*$     | 27         |                    |
| S <sub>1</sub> →S <sub>0</sub>  | 458               | 1.6002   | $\pi_H \rightarrow \pi_L^*$         | 93         |                    |
| <b>B rotamer</b>                |                   |          |                                     |            |                    |
| S <sub>0</sub> →S <sub>1</sub>  | 383               | 1.0556   | $\pi_H \rightarrow \pi_L^*$         | 81         | 370                |
| S <sub>0</sub> →S <sub>2</sub>  | 321               | 0.2933   | $\pi_{H-1} \rightarrow \pi_L^*$     | 70         |                    |
| S <sub>0</sub> →S <sub>3</sub>  | 281               | 0.0965   | $\pi_H \rightarrow \pi_{L+2}^*$     | 35         |                    |
| S <sub>0</sub> →S <sub>4</sub>  | 260               | 0.4449   | $\pi_H \rightarrow \pi_{L+1}^*$     | 33         |                    |
| S <sub>0</sub> →S <sub>5</sub>  | 247               | 0.0344   | $\pi_{H-1} \rightarrow \pi_{L+2}^*$ | 20         |                    |
| S <sub>0</sub> →S <sub>6</sub>  | 237               | 0.0041   | $\pi_{H-2} \rightarrow \pi_L^*$     | 50         |                    |
| S <sub>0</sub> →S <sub>7</sub>  | 227               | 0.6508   | $\pi_{H-1} \rightarrow \pi_{L+2}^*$ | 38         |                    |
| S <sub>0</sub> →S <sub>8</sub>  | 218               | 0.0769   | $\pi_{H-3} \rightarrow \pi_L^*$     | 42         |                    |
| S <sub>0</sub> →S <sub>9</sub>  | 216               | 0.0420   | $\pi_{H-1} \rightarrow \pi_{L+1}^*$ | 33         |                    |
| S <sub>0</sub> →S <sub>10</sub> | 211               | 0.3045   | $\pi_{H-4} \rightarrow \pi_{L+6}^*$ | 61         |                    |
| S <sub>1</sub> →S <sub>0</sub>  | 473               | 1.2558   | $\pi_H \rightarrow \pi_L^*$         | 94         |                    |
| <b>C rotamer</b>                |                   |          |                                     |            |                    |
| S <sub>0</sub> →S <sub>1</sub>  | 390               | 1.4834   | $\pi_H \rightarrow \pi_L^*$         | 84         | 370                |
| S <sub>0</sub> →S <sub>2</sub>  | 324               | 0.1374   | $\pi_{H-1} \rightarrow \pi_L^*$     | 75         |                    |
| S <sub>0</sub> →S <sub>3</sub>  | 276               | 0.0314   | $\pi_H \rightarrow \pi_{L+1}^*$     | 34         |                    |
| S <sub>0</sub> →S <sub>4</sub>  | 269               | 0.2390   | $\pi_H \rightarrow \pi_{L+2}^*$     | 46         |                    |
| S <sub>0</sub> →S <sub>5</sub>  | 245               | 0.1577   | $\pi_{H-1} \rightarrow \pi_{L+2}^*$ | 53         |                    |
| S <sub>0</sub> →S <sub>6</sub>  | 241               | 0.0257   | $\pi_{H-2} \rightarrow \pi_L^*$     | 67         |                    |
| S <sub>0</sub> →S <sub>7</sub>  | 224               | 0.8232   | $\pi_{H-1} \rightarrow \pi_{L+2}^*$ | 32         |                    |
| S <sub>0</sub> →S <sub>8</sub>  | 218               | 0.0237   | $\pi_{H-3} \rightarrow \pi_L^*$     | 53         |                    |
| S <sub>0</sub> →S <sub>9</sub>  | 216               | 0.0790   | $\pi_{H-1} \rightarrow \pi_{L+1}^*$ | 35         |                    |
| S <sub>0</sub> →S <sub>10</sub> | 208               | 0.2109   | $\pi_{H-4} \rightarrow \pi_L^*$     | 39         |                    |
| S <sub>1</sub> →S <sub>0</sub>  | 460               | 1.6231   | $\pi_H \rightarrow \pi_L^*$         | 94         |                    |
| <b>D rotamer</b>                |                   |          |                                     |            |                    |
| S <sub>0</sub> →S <sub>1</sub>  | 389               | 1.1036   | $\pi_H \rightarrow \pi_L^*$         | 83         | 370                |
| S <sub>0</sub> →S <sub>2</sub>  | 324               | 0.3128   | $\pi_{H-1} \rightarrow \pi_L^*$     | 73         |                    |

|                          |     |        |                                     |    |     |
|--------------------------|-----|--------|-------------------------------------|----|-----|
| $S_0 \rightarrow S_3$    | 282 | 0.1822 | $\pi_H \rightarrow \pi_{L+1}^*$     | 41 |     |
| $S_0 \rightarrow S_4$    | 264 | 0.2779 | $\pi_H \rightarrow \pi_{L+2}^*$     | 42 |     |
| $S_0 \rightarrow S_5$    | 245 | 0.0581 | $\pi_{H-1} \rightarrow \pi_{L+2}^*$ | 23 |     |
| $S_0 \rightarrow S_6$    | 239 | 0.0224 | $\pi_{H-2} \rightarrow \pi_{L+2}^*$ | 50 |     |
| $S_0 \rightarrow S_7$    | 225 | 0.6072 | $\pi_H \rightarrow \pi_{L+3}^*$     | 42 |     |
| $S_0 \rightarrow S_8$    | 219 | 0.0123 | $\pi_{H-1} \rightarrow \pi_{L+1}^*$ | 19 |     |
| $S_0 \rightarrow S_9$    | 218 | 0.0298 | $\pi_{H-3} \rightarrow \pi_{L+2}^*$ | 54 |     |
| $S_0 \rightarrow S_{10}$ | 210 | 0.2356 | $\pi_H \rightarrow \pi_{L+6}^*$     | 72 |     |
| $S_1 \rightarrow S_0$    | 478 | 1.2542 | $\pi_H \rightarrow \pi_{L+1}^*$     | 95 | 488 |

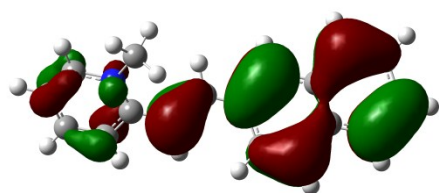

A rotamer: HOMO

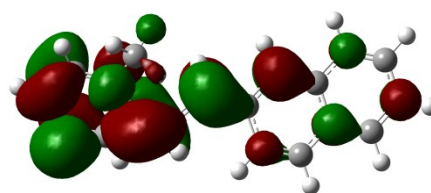

LUMO

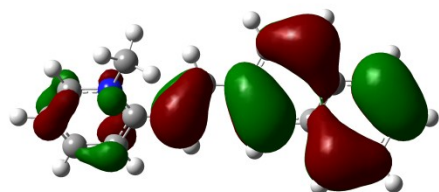

B rotamer: HOMO

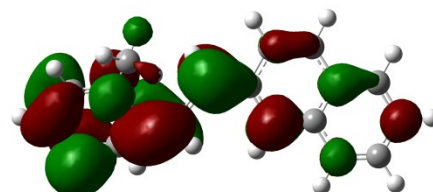

LUMO

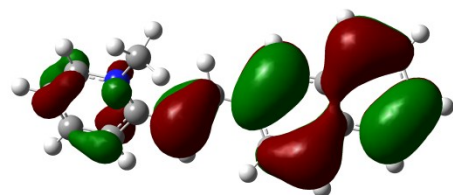

C rotamer: HOMO

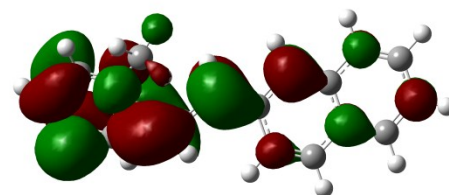

LUMO

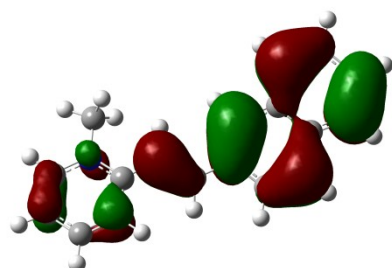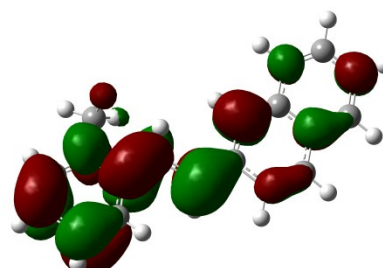

D rotamer

HOMO

LUMO

**Chart 2S.** Molecular orbitals of **2-N** (rotamers A-D) obtained by the CAM-B3LYP/6-31+G(d) model.

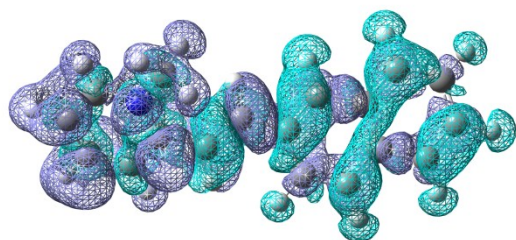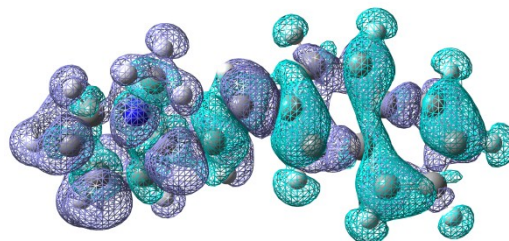

A rotamer

B rotamer

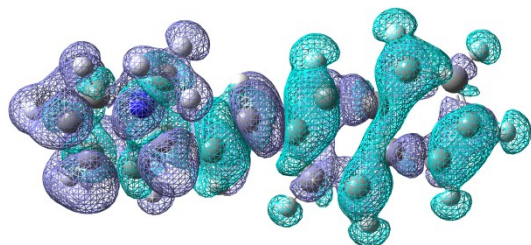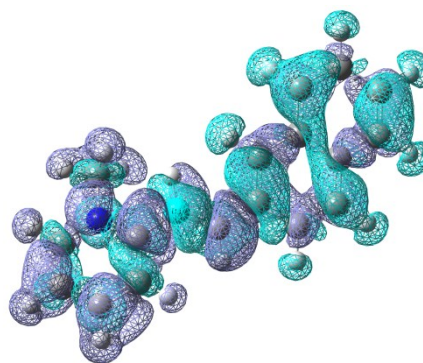

C rotamer

D rotamer

**Chart 3S.** Effect of the  $S_0 \rightarrow S_1$  transition on the electron density of **2-N** (rotamers A-D); increase and decrease of electron densities are represented by violet and cyano, respectively.

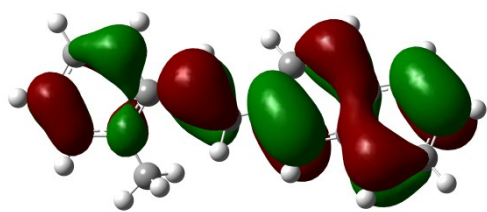

A rotamer

HOMO

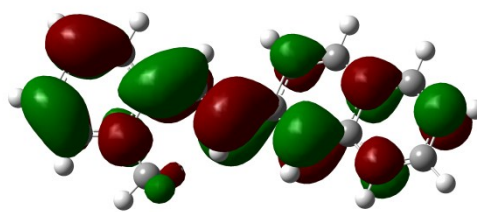

LUMO

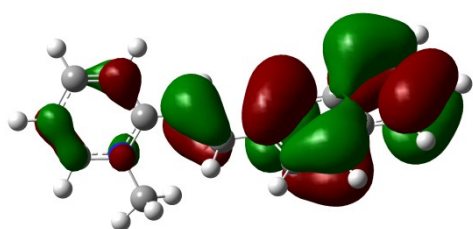

B rotamer

HOMO

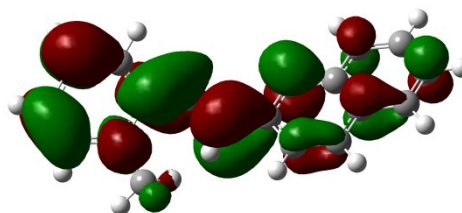

LUMO

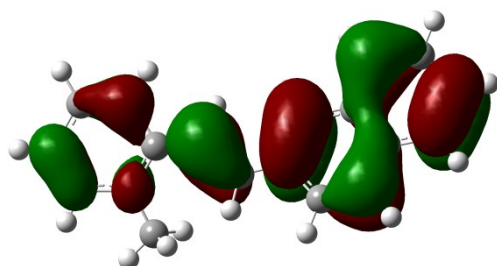

C rotamer

HOMO

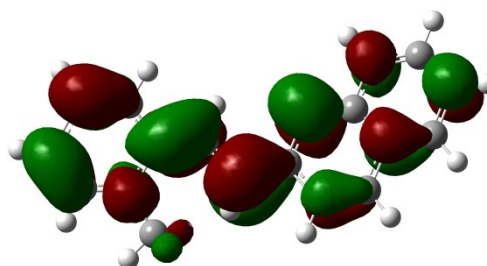

LUMO

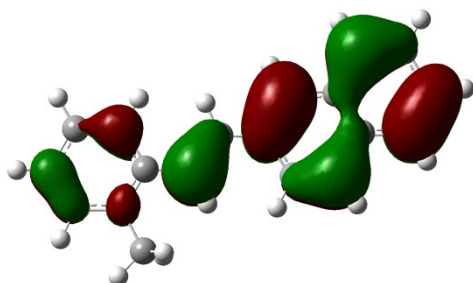

HOMO

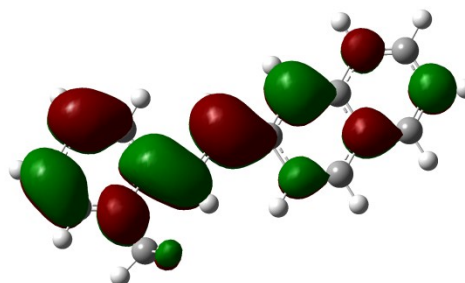

LUMO

D rotamer

**Chart 4S.** Molecular orbitals of 2-N (rotamers A-D) @ $S_{1,rel}$  obtained by the CAM-B3LYP/6-31+G(d) model.

**Table 2S.** Dipole moments and main dihedral angles (Deg) of **2-N** rotamers obtained by the CAM-B3LYP/6-31+G(d) model in DCM (CPCM).

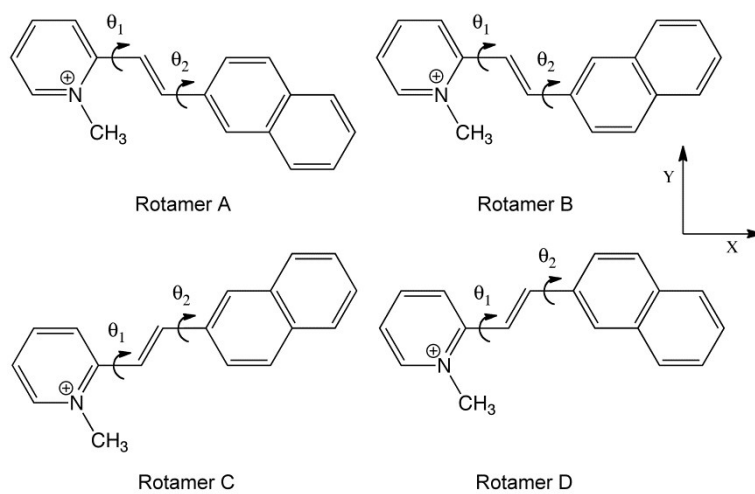

| rotamer  | state       | $ \mu_x $ | $ \mu_y $ | $ \mu_z $ | $ \mu_T $ | $\theta_1$ | $\theta_2$ |
|----------|-------------|-----------|-----------|-----------|-----------|------------|------------|
| <b>A</b> | $S_0$       | 15.9      | 1.93      | 0.39      | 15.0      | 34.5       | 9.0        |
|          | $S_{1,FC}$  | 3.63      | 1.88      | 0.49      | 4.12      |            |            |
|          | $S_{1,rel}$ | 4.61      | 1.90      | 0.28      | 4.99      | 11.6       | 4.2        |
| <b>B</b> | $S_0$       | 15.2      | 0.81      | 0.69      | 15.2      | 33.7       | 9.4        |
|          | $S_{1,FC}$  | 4.14      | 0.99      | 0.77      | 4.33      |            |            |
|          | $S_{1,rel}$ | 5.08      | 0.84      | 0.45      | 5.17      | 11.9       | 4.0        |
| <b>C</b> | $S_0$       | 14.8      | 0.78      | 0.00      | 14.9      | 0.1        | 0.0        |
|          | $S_{1,FC}$  | 5.13      | 1.21      | 0.00      | 5.27      |            |            |
|          | $S_{1,rel}$ | 5.78      | 1.12      | 0.00      | 5.88      | 0.0        | 0.0        |
| <b>D</b> | $S_0$       | 14.7      | 2.05      | 0.34      | 14.9      | 22.0       | 2.8        |
|          | $S_{1,FC}$  | 4.65      | 2.30      | 0.36      | 5.20      |            |            |
|          | $S_{1,rel}$ | 5.46      | 2.30      | 0.00      | 5.93      | 0.0        | 0.0        |



## Ultrafast measurements

**Table 3S.** Spectral and kinetic properties of 2-N obtained from femtosecond excited state absorption measurements in solvents of different polarity and/or viscosity.

| Solvent           | 2-N        |                                                             | Assignment             |
|-------------------|------------|-------------------------------------------------------------|------------------------|
|                   | $\tau$ /ps | $\lambda$ /nm                                               |                        |
| DCM               | 0.62       | 575(+), 720(+) <sup>sh</sup>                                | Solv.                  |
|                   | 14         | 450(+), 495(-) 555(+), 715(+) <sup>sh</sup>                 | VC o CR                |
|                   | 85         | 455(+), 500(-), 545(+), 720(+) <sup>sh</sup>                | S <sub>1,rel</sub> (D) |
|                   | rest       | broad                                                       | T <sub>1</sub>         |
| DCE               | 0.25       | 525(+), 580(+)                                              | Solv.                  |
|                   | 3.1        | 490(-), 565(+), 715(+) <sup>sh</sup>                        | Solv.                  |
|                   | 63         | 500(-), 545(+), 685(+)                                      | S <sub>1,rel</sub> (D) |
|                   | rest       | broad                                                       | T <sub>1</sub>         |
| MeCN              | 0.50       | 570(+)                                                      | Solv.                  |
|                   | 4.8        | 500(-), 540(+), 590(-), 710(+)                              | VC o CR                |
|                   | 82         | 495(-), 530(+), 590(-), 720(+)                              | S <sub>1,rel</sub> (D) |
| 2-PrOH            | 0.69       | 515(-), 545(+) <sup>sh</sup> , 605(+), 690(+) <sup>sh</sup> | Solv.                  |
|                   | 8.4        | 490(-), 570(+), 690(+) <sup>sh</sup>                        | Solv.                  |
|                   | 82         | 490(-), 555(+), 685(+)                                      | S <sub>1,rel</sub> (D) |
| EtOH              | 0.40       | 520(+) <sup>sh</sup> , 580(+)                               | Solv.                  |
|                   | 8.1        | 480(-), 560(+)                                              | Solv.                  |
|                   | 78         | 495(-), 540(+), 720(+)                                      | S <sub>1,rel</sub> (D) |
| MeOH              | 0.40       | 570(+)                                                      | Solv.                  |
|                   | 3.5        | 490(-), 555(+)                                              | Solv.                  |
|                   | 85         | 500(-), 540(+), 580(-), 710(+)                              | S <sub>1,rel</sub> (D) |
|                   | rest       | broad                                                       | T <sub>1</sub>         |
| MeOH/Gly<br>50:50 | 0.68       | 525(+), 570(+), 700(+) <sup>sh</sup>                        | Solv.                  |
|                   | 10         | 485(-), 560(+), 680(+) <sup>sh</sup>                        | Solv.                  |
|                   | 100        | 495(-), 545(+), 590(-), 690(+)                              | S <sub>1,rel</sub> (D) |
|                   | rest       | broad                                                       | T <sub>1</sub>         |
| EtGly             | 0.77       | 535(+), 575(+), 705(+) <sup>sh</sup>                        | Solv.                  |
|                   | 28         | <495(-), 560(+), 700(+) <sup>sh</sup>                       | Solv.                  |
|                   | 118        | <510(-), 550(+), 590(-), 675(+) <sup>sh</sup>               | S <sub>1,rel</sub> (D) |
|                   | rest       | broad                                                       | T <sub>1</sub>         |
| W/EtOH<br>70:30   | 0.06       | 485(-), 565(+), 690(+) <sup>sh</sup>                        | Solv.                  |
|                   | 1.7        | 485(-), 555(+)                                              | Solv.                  |
|                   | 74         | 495(-), 540(+), 700(+)                                      | S <sub>1,rel</sub> (D) |

## Temperature effect on the absorption and emission

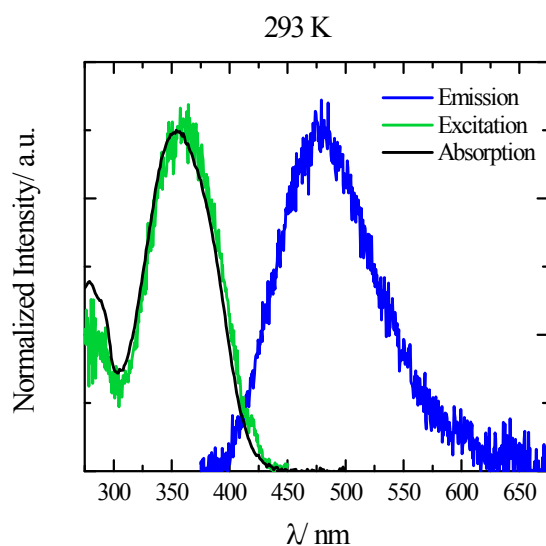

**Figure 7S.** Absorption (black line), excitation (green line) and emission (blue line) spectra of **2-N** in EPA at room temperature.

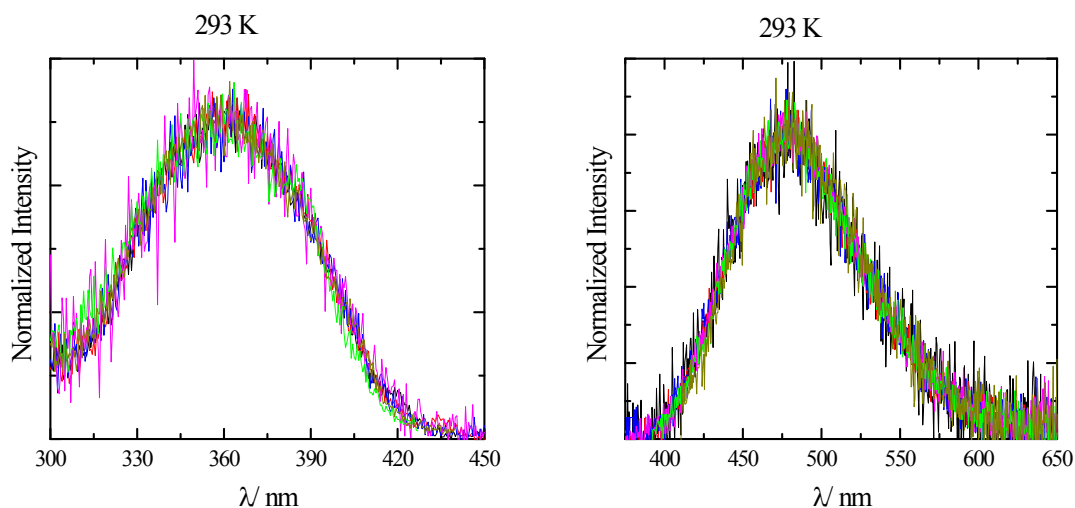

**Figure 8S.** Emission wavelength effect on the excitation spectrum (left graph, with  $\lambda_{em} = 420\text{--}480$  nm) and excitation wavelength effect on the emission spectrum (right graph, with  $\lambda_{exc} = 325\text{--}400$  nm) for **2-N** in EPA at room temperature.

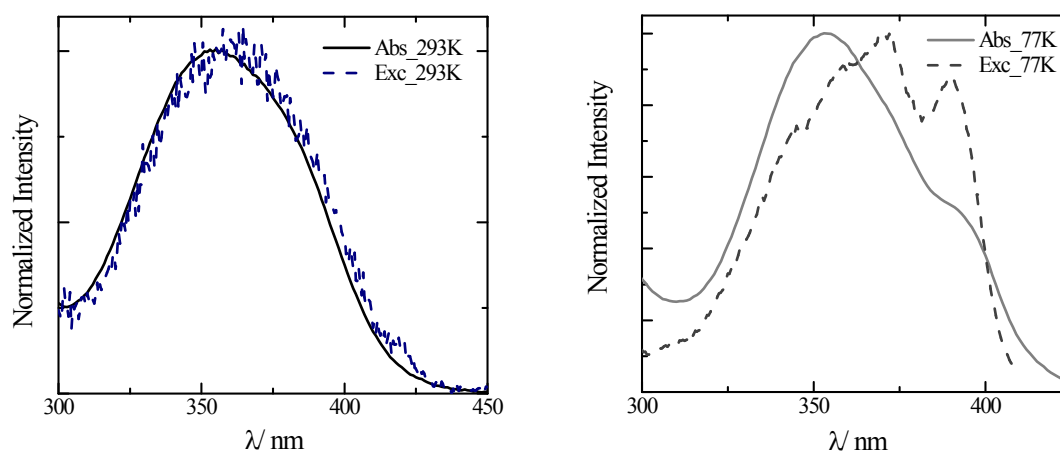

**Figure 9S.** Absorption and excitation spectra at 293 K ( $\lambda_{em} = 480$  nm, left graph) and 77 K ( $\lambda_{em} = 430$  nm, right graph) for **2-N** in EPA.

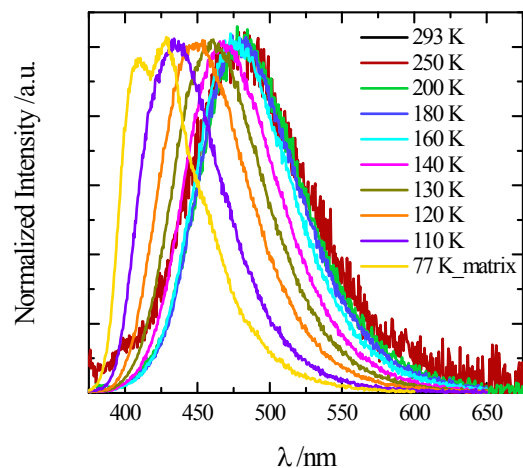

**Figure 10S.** Temperature effect on the emission spectra of **2-N** in EPA.

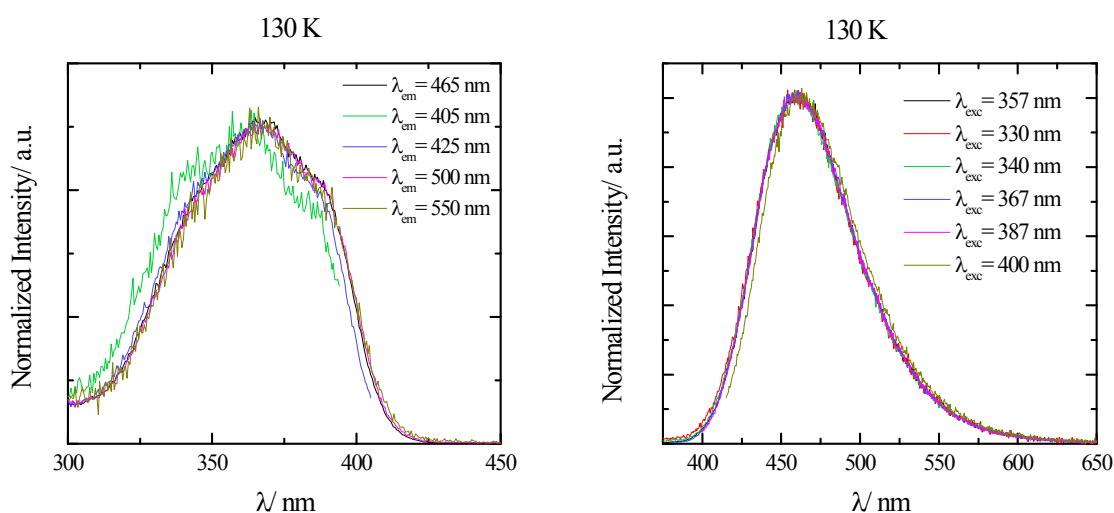

**Figure 11S.** Emission wavelength effect on the excitation spectrum (left graph) and excitation wavelength effect on the emission spectrum (right graph) for **2-N** in EPA at 130 K.

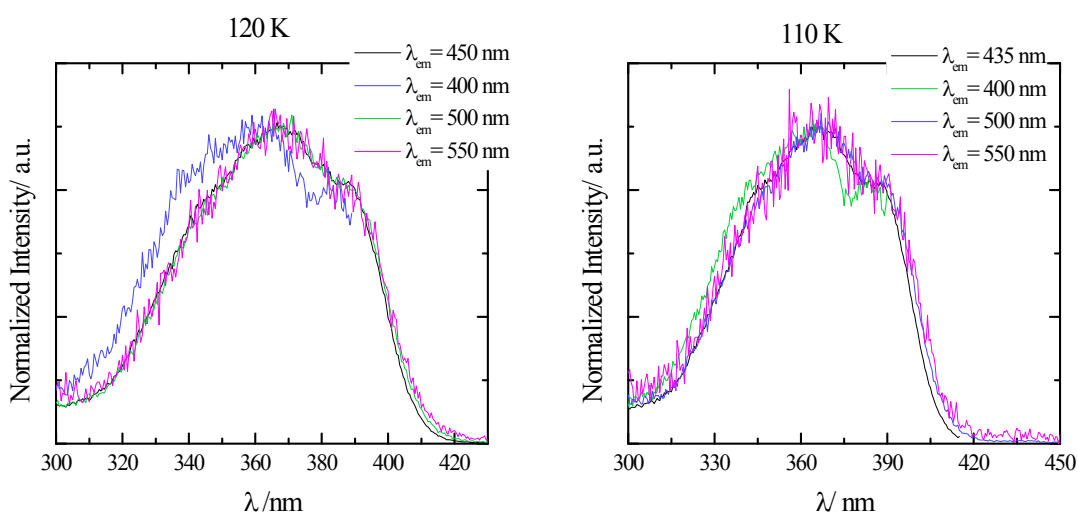

**Figure 12S.** Emission wavelength effect on the excitation spectrum for **2-N** in EPA at 120 K(left graph) and 110 K (right graph).

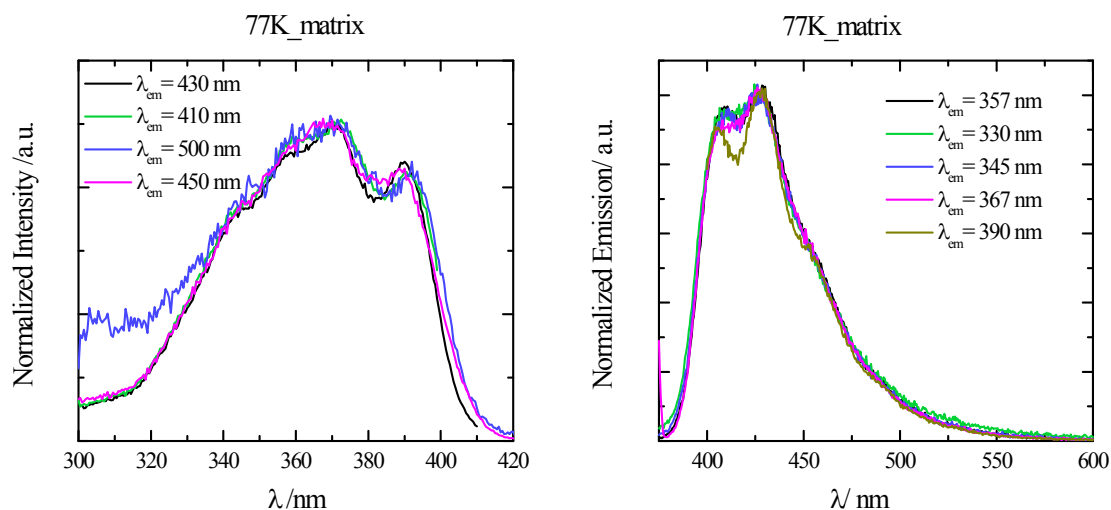

**Figure 13S.** Emission wavelength effect on the excitation spectrum (left graph) and excitation wavelength effect on the emission spectrum (right graph) for **2-N** in EPA matrix (77 K).

**Table 4S.** Wavelength effect on the fluorescence quantum yield in EPA at room temperature and in matrix at 77 K.

| T = 293 K       |          |
|-----------------|----------|
| $\lambda_{exc}$ | $\Phi_F$ |
| 325             | 0.0028   |
| 340             | 0.0030   |
| 355             | 0.0033   |
| 362             | 0.0034   |
| 380             | 0.0034   |
| 400             | 0.0034   |

| T = 77 K        |          |
|-----------------|----------|
| $\lambda_{exc}$ | $\Phi_F$ |
| 330             | 0.49     |
| 345             | 0.47     |
| 357             | 0.54     |
| 367             | 0.66     |
| 390             | 0.95     |

**Table 5S.** Temperature effect on the fluorescence lifetimes in EPA measured by nanosecond resolved SPC fluorescence spectroscopy ( $\lambda_{exc}=370$  nm). The different colours stand for different contributions to the decay.

| Temperature /K | $\lambda_{em}$ |          |            |          |            |          |
|----------------|----------------|----------|------------|----------|------------|----------|
|                | 425 nm         |          | 480 nm     |          | 525 nm     |          |
|                | $\tau$ /ns     | $\chi^2$ | $\tau$ /ns | $\chi^2$ | $\tau$ /ns | $\chi^2$ |
| 250            | 0.396          | 1.01     | 0.396      | 0.97     |            |          |
| 220            | 0.788          | 1.03     | 0.769      | 1.02     | 0.644      | 1.12     |
| 200            | 0.202          | 1.09     | 0.295      | 0.97     |            | 1.11     |
|                | 1.23           |          | 1.10       |          | 1.05       |          |
| 180            | 0.548          | 0.97     | 0.500      | 1.02     |            |          |
|                | 1.73           |          | 1.86       |          |            |          |
| 160            | 0.827          | 1.00     | 0.800      | 1.00     |            |          |
|                | 2.66           |          | 2.66       |          |            |          |
| 140            | 1.20           | 1.10     | 1.22       | 1.00     |            |          |
|                | 2.99           |          | 2.99       |          |            |          |
| 130            | 0.423          | 0.99     | -          | 0.98     |            | 1.04     |
|                | 1.58           |          | 1.64       |          |            |          |
|                |                |          | 2.99       |          | 3.11       |          |
| 120            | 0.590          | 0.99     |            | 0.97     |            | 1.04     |
|                | 1.67           |          | 1.76       |          |            |          |
|                |                |          | 2.83       |          | 2.92       |          |
| 110            | 0.849          | 1.01     |            | 0.99     |            | 1.01     |
|                | 1.80           |          | 1.80       |          |            |          |
|                |                |          | 2.90       |          | 1.89       |          |
| 77             | 1.42           | 0.99     |            | 1.03     |            | 1.04     |
|                | 1.83           |          | 1.81       |          |            |          |
|                |                |          |            |          | 1.62       |          |
|                |                |          |            |          | 3.00       |          |

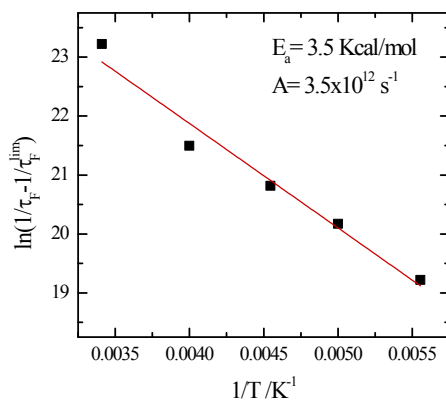

**Figure 14S.** Plot of the fluorescence lifetimes as a function of temperature according to the Arrhenius-type equation for the longest-living conformer.

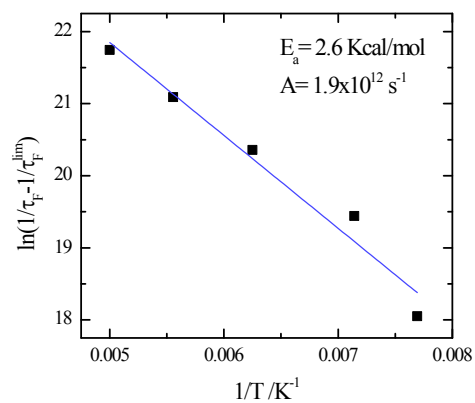

**Figure 15S.** Plot of the fluorescence lifetimes as a function of temperature according to the Arrhenius-type equation for the intermediate conformer.

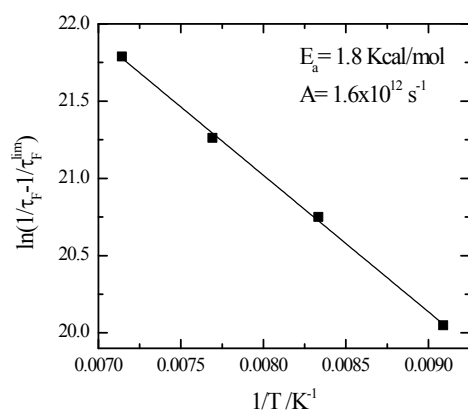

**Figure 16S.** Plot of the fluorescence lifetimes as a function of temperature according to the Arrhenius-type equation for the shortest conformer.
